# *Theta activity paradoxically boosts gamma and ripple frequency sensitivity in prefrontal interneurons*

Ricardo Martins Merino<sup>1,2,3,4,5</sup>, Carolina Leon-Pinzon<sup>1,2,3,5</sup>, Walter Stühmer<sup>3,5</sup>,  
Martin Möck<sup>6</sup>, Jochen F. Staiger<sup>6</sup>, Fred Wolf<sup>1,2,3,5,7,8</sup>, Andreas Neef<sup>1,2,3,5,7,8\*</sup>

<sup>1</sup>Max Planck Institute for Dynamics and Self-Organization, Göttingen, Germany.

<sup>2</sup>Göttingen Campus Institute for Dynamics of Biological Networks, Göttingen, Germany.

<sup>3</sup>Bernstein Center for Computational Neuroscience Göttingen, Germany.

<sup>4</sup>Göttingen Graduate Center for Neurosciences, Biophysics, and Molecular Biosciences, University of Göttingen, Germany.

<sup>5</sup>Max Planck Institute of Experimental Medicine, Göttingen, Germany.

<sup>6</sup>Institute for Neuroanatomy, University Medical Center Göttingen, Georg-August-University, Göttingen, Germany.

<sup>7</sup>Institute for Nonlinear Dynamics, Georg-August University School of Science, Göttingen, Germany.

<sup>8</sup>Center for Biostructural Imaging of Neurodegeneration, Göttingen, Germany.

\*e-mail: [aneef@gwdg.de](mailto:aneef@gwdg.de)

## **Abstract**

Fast oscillations in cortical circuits critically depend on GABAergic interneurons. Which interneuron types and populations can drive different cortical rhythms, however, remains unresolved and may depend on brain state. Here, we measured the sensitivity of different GABAergic interneurons in prefrontal cortex under conditions mimicking distinct brain states. While fast-spiking neurons always exhibited a wide bandwidth of around 400 Hz, the response properties of spike-frequency adapting interneurons switched with the background input's statistics. Slowly fluctuating background activity, as typical for sleep or quiet wakefulness, dramatically boosted the neurons' sensitivity to gamma- and ripple-frequencies. A novel time-resolved dynamic gain analysis revealed rapid sensitivity modulations that enable neurons to periodically boost gamma oscillations and ripples during specific phases of ongoing low-frequency oscillations. This mechanism presumably contributes substantially to cross-frequency coupling and predicts these prefrontal interneurons to be exquisitely sensitive to high-frequency ripples, especially during brain states characterized by slow rhythms.

## **MAIN TEXT**

### **Introduction**

Collective rhythmic activity is implicated in brain functions from sensory information processing to memory consolidation, often with higher frequency activity bouts locked onto lower frequencies (1-3). While the mechanism behind this cross-frequency-coupling is unclear (3), the initiation and maintenance of gamma band (30-150 Hz) oscillations are closely associated with fast-spiking (FS), parvalbumin-positive interneurons (4, 5). When driven with frequency chirps, and as a result of intrinsic membrane properties, FS neurons fire more robustly at higher input frequencies than spike-frequency adapting (AD), somatostatin-positive interneurons, which are most responsive to lower frequencies (6). Nevertheless, recent studies strongly suggest that, under certain conditions, somatostatin-positive interneurons are crucial for gamma oscillations (7-9). Could the spectral sensitivity of different interneuron populations perhaps be itself state-dependent? Here we characterized

52 cortical GABAergic interneurons at different *in vivo*-like working points by measuring their  
 53 dynamic gain (10-14).  
 54 Dynamic gain quantifies how input in different frequency bands modulates population firing  
 55 under *in vivo*-like conditions of fluctuating background input. To probe the potential impact of  
 56 different brain states on spectral sensitivity, we used different types of background inputs that  
 57 mimic the strength and timescales of correlations in background input across brain states (15).  
 58 We find that both FS and AD interneuron populations can have remarkably wide bandwidths  
 59 (up to about 500 Hz), making them capable of tracking fast input frequencies well into the  
 60 range of sharp wave-ripples.  
 61 Moreover, our results uncover unanticipated flexibility in AD neurons, which can massively  
 62 shift their frequency preference, specifically engaging or disengaging with high-frequency  
 63 rhythms, such as gamma and sharp wave-ripples. The presence or absence of slowly-  
 64 correlated input drives this sensitivity shift, which can occur within 50 ms, in phase with an  
 65 ongoing slow rhythm. This observation offers a mechanistic explanation for theta-gamma  
 66 cross-frequency coupling.  
 67

## 68 Results

69 AD and FS (Figs. 1A and 1B) are the most common firing patterns of somatostatin- and  
 70 parvalbumin-positive interneurons, respectively (16). Their spectral selectivity has been  
 71 investigated through sub- and supra-threshold cellular responses to simple, purely sinusoidal  
 72 inputs (6) (Figs. 1C and 1D). However, *in vivo*, even when activity on the population level is  
 73 periodic, the firing of individual neurons appears stochastic, driven by noisy, fluctuating inputs  
 74 rather than pure sinusoids (13, 17). We thus probed the spectral sensitivity of mouse layer 2/3  
 75 prefrontal FS and AD interneuron populations under naturalistic operating conditions (Fig. 1E).  
 76 These dynamic gain measurements require precise control over the neurons' input to a degree  
 77 that cannot be attained *in vivo*. We, therefore, used patch-clamp recordings in current-clamp  
 78 mode in acute prefrontal slices to establish two different regimes of fluctuating input,  
 79 distinguished by the correlation time  $\tau$ : the first case,  $\tau = 5$  ms, mimics the case of completely  
 80 asynchronous population activity, when the decay time-constant of synaptic currents is the only  
 81 source of input correlations (Fig. 1E, black traces). The other input, characterized by a much  
 82 slower 25 ms correlation time, mimics brain states with population activity exhibiting slow  
 83 fluctuations, such as quiet wakefulness or slow-wave sleep (15) (Fig. 1E, gray traces).

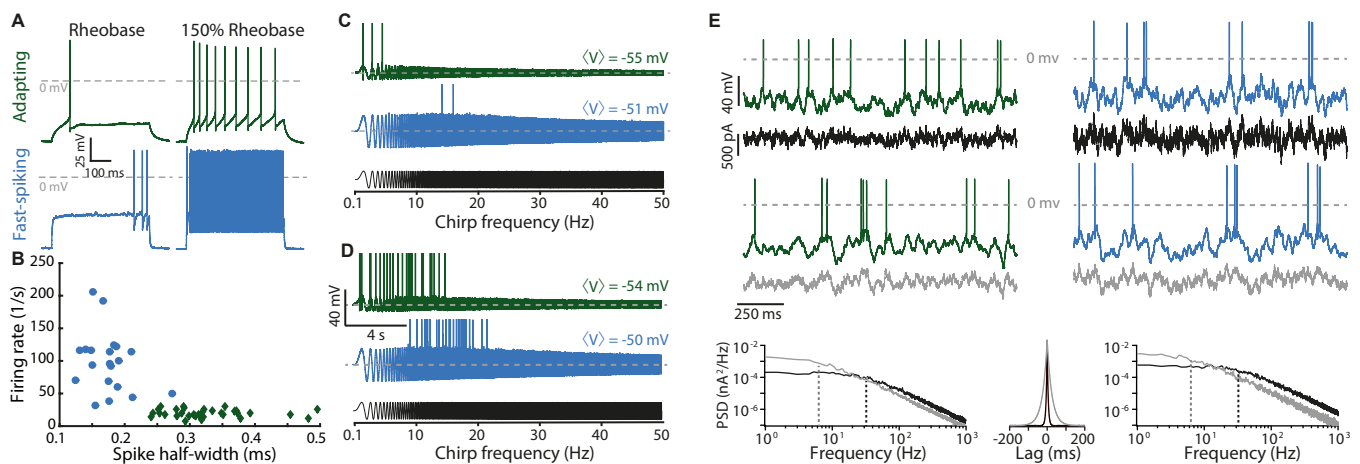

84  
 85 **Fig 1. Characterization of neocortical adapting and fast-spiking interneurons.** (A) Square pulses of 500 ms  
 86 were used to determine the recorded neuron's firing pattern at the 150% rheobase level. Shown are representative  
 87 responses of spike-frequency adapting (AD, green) and fast-spiking (FS, blue) neurons at rheobase and 150 %  
 88 rheobase. (B) Spike half-width and firing rate allow a clear distinction between these cell types. (C) Frequency  
 89 chirp currents (black) have been used to characterize the spectral sensitivity of neurons. They yield action potentials  
 90 (shown clipped) at lower input frequencies for AD neurons than for FS neurons. (D) A slight increase in the offset  
 91 current, resulting in only a 1 mV depolarization, results in overlapping bandwidths for AD and FS neurons,  
 92 indicating substantial uncertainty in chirp-based characterizations. (E) We assessed neuronal encoding  
 93 performance in two *in vivo*-like regimes, distinguished by the correlation time of the fluctuating stimuli ( $\tau = 5$  ms,

94 black, and  $\tau = 25$  ms, gray). The stimulus amplitude at each trial was adjusted to achieve a target operating point  
 95 (characterized by firing rate and spike train irregularity; see Methods). The corresponding voltage traces of AD  
 96 and FS neurons are shown above the stimuli, and the power spectral densities (PSDs) and autocorrelations of the  
 97 inputs are shown at the bottom. The dashed lines in the PSDs indicate the cut-off frequencies (32 Hz and 6.4 Hz)  
 98 corresponding to the correlation times of the different inputs.

### 99 *Input correlations determine frequency selectivity*

100 The spectral sensitivity of interneurons was markedly different from their chirp responses, and  
 101 for AD cells, it changed drastically between the two conditions (Figure 2A). In the asynchronous  
 102 regime, AD neurons respond preferentially to slow components, with the highest sensitivity in  
 103 the 2-4 Hz range (mean dynamic gain = 119 Hz/nA, 95% bootstrap confidence interval: [117,  
 104 122]). The average gain in the gamma range (Fig. 2A, shaded region) reaches only 62% of the  
 105 average at lower frequencies (< 20 Hz) (64 Hz/nA [63, 65] vs 103 Hz/nA [101, 105]). These  
 106 values mean that the addition of a small, 10 pA sinusoidal modulation (equivalent in magnitude  
 107 to a single synaptic event) on top of the irregularly fluctuating background input would modulate  
 108 the AD population's firing rate by 1.2 Hz in response to a superimposed 3 Hz input, but it would  
 109 modulate the firing rate only by 0.6 Hz for 60 Hz, indicating a clear preference for lower  
 110 frequencies. This preference, however, changed completely when AD neurons were exposed to  
 111 slowly fluctuating input such that their preferred frequency shifted from 3 Hz to 200 Hz. The  
 112 gain at 2-4 Hz dropped from 119 Hz/nA [117, 122] to 91 Hz/nA [89, 92], and the gain at 200  
 113 Hz increased from 74 Hz/nA [72, 76] to 119 Hz/nA [113, 124]. Figure 2B demonstrates the  
 114 occurrence of this shift in two individual AD neurons. With this abrupt change in frequency  
 115 preference, AD neurons in the synchronous regime become more sensitive to gamma input than  
 116 to lower frequencies (average gains: 97 Hz/nA [94, 101] vs 81 Hz/nA [80, 83]). Altogether,  
 117 these data reveal that, during network states characterized by slow background fluctuations, AD  
 118 cells tune themselves to gamma and higher-frequency input. FS interneurons, on the other hand,  
 119 preferentially transmit high frequencies irrespective of the input correlations, with a maximum  
 120 sensitivity around 200-250 Hz (Fig. 2C). Both, FS interneurons and, given sufficiently slow  
 121 input components, AD interneurons have a remarkably wide bandwidth, with a high-frequency  
 122 limit well above 400 Hz, an order of magnitude higher than expected from their chirp-responses.  
 123

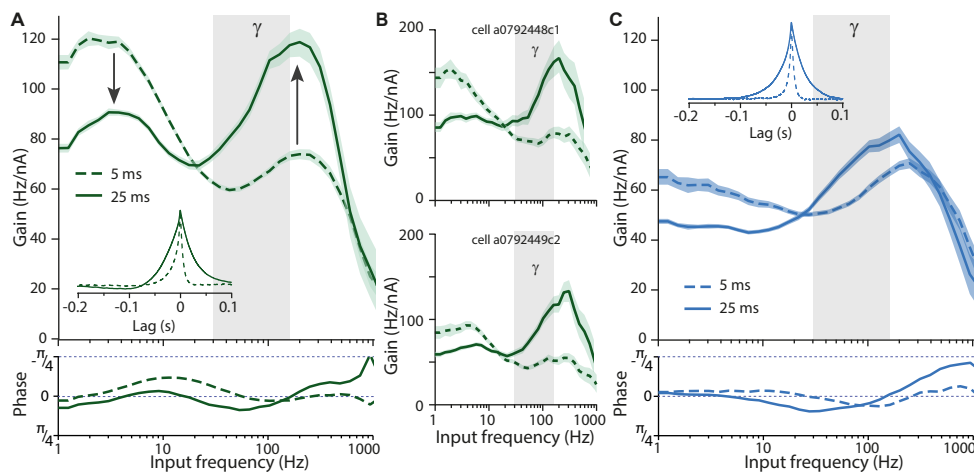

124 **Fig. 2. Spectral selectivity of AD neurons drastically shifts for different background fluctuations.** (A) (top)  
 125 Gain of AD neurons tested with inputs with two different correlation times. Under fast background input,  $\tau = 5$  ms  
 126 (dashed lines,  $n = 12$ ), AD neurons modulate their firing rate strongest in response to lower frequencies. Under  
 127 slow background,  $\tau = 25$  ms (continuous line,  $n = 10$ ), the frequency preference shifts (arrows) and the firing rate  
 128 is modulated mainly by high frequencies. Mean firing rate and coefficient of variation of the interspike intervals  
 129 were  $4.0 \text{ Hz} \pm 0.2$  and  $0.99 \pm 0.02$  (5 ms input) and  $3.7 \text{ Hz} \pm 0.2$  and  $1.03 \pm 0.05$  (25 ms input), respectively. Inset:  
 130 spike-triggered average input across all recorded cells tested with the same correlation times. Gains were calculated  
 131 by taking the ratio of the Fourier transforms of the spike-triggered average and of the autocorrelation function of  
 132 the input. Gray columns represent the gamma frequency band, and the shaded region around gain curves represents  
 133 the 95% bootstrap confidence interval. (Bottom) Phase of firing rate modulation with respect to input. No  
 134 substantial phase-delays are associated with action potential generation. (B) Individual gain curves of two AD cells  
 135 from A for both correlation times. The drastic shift in frequency preference is clearly visible at the single-cell level.

(C) As in A, but for FS neurons. Those display a wide bandwidth and no drastic shifts in frequency preference ( $\tau = 5$  ms, dashed lines,  $n = 7$ ;  $\tau = 25$  ms, continuous lines,  $n = 9$ ). Grand-averaged firing rate and coefficient of variation of the interspike intervals were  $5.0 \text{ Hz} \pm 0.6$  and  $1.12 \pm 0.24$  (5 ms) and  $3.6 \text{ Hz} \pm 0.2$  and  $1.47 \pm 0.10$  (25 ms). Numbers are given as mean  $\pm$  SEM.

*Theta input reliably boosts gamma- and ripple-sensitivity of spike-frequency adapting neurons*

This input-dependent spectral sensitivity might allow AD neurons to provide brain-state-dependent feedback input into the local cortical circuit. Interestingly, AD neurons shift their preference to the gamma-band when lower frequencies dominate their input. This suggests that the presence of theta oscillations (4-12 Hz) could tune them to higher frequencies, boosting gamma components. To test this hypothesis, we exposed AD neurons to the rapidly fluctuating, 5 ms correlated background input, either on its own or supplemented with theta-band components (Fig. 3A). We found that the theta-band components indeed boosted the gain for frequencies above 30 Hz, with the average gamma-band gain increasing from 71 Hz/nA [69, 73] to 86 Hz/nA [83, 89] and the average gain in the ripple-band increasing from 79 Hz/nA [77, 82] to 105 Hz/nA [101, 110] (Figure 3B). The gamma/theta ratio increased in 9 out of 10 cells, from  $0.56 \pm 0.02$  to  $0.74 \pm 0.05$ , while the ripple/theta ratio increased from  $0.63 \pm 0.02$  to  $0.88 \pm 0.05$  (mean  $\pm$  SEM; Fig. 3C), revealing that, indeed, an increase in theta power boosts gamma- and ripple-sensitivity of AD neurons.

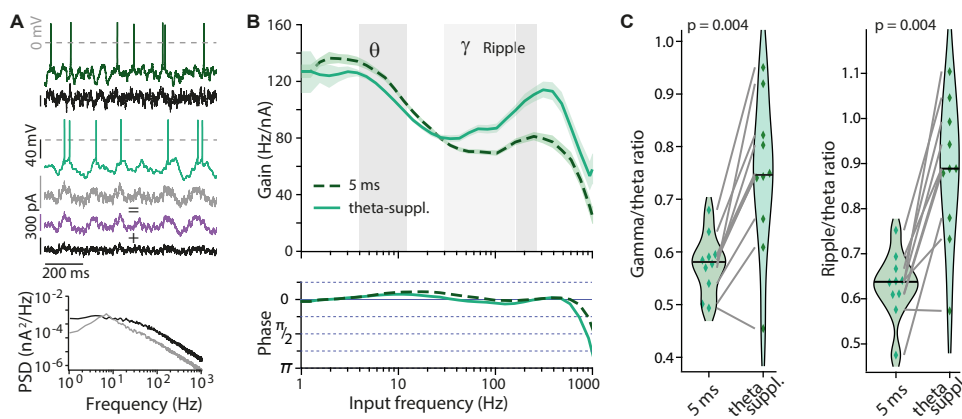

**Figure 3. Increasing theta input to AD neurons boosts sensitivity to gamma and ripple frequencies.** (A) Sample stimuli and voltage traces (dark green, 5 ms input; light green, theta-supplemented input) and power spectral density of noisy inputs with  $\tau = 5$  ms (black) and theta-supplemented 5 ms input (gray). Theta-supplemented input was constructed by adding a theta bandpass filtered white noise input (purple) to the 5 ms input. Grand-averaged firing rate and coefficient of variation of the interspike intervals were  $4.58 \text{ Hz} \pm 0.23$  and  $0.97 \pm 0.03$  (5 ms input) and  $4.78 \text{ Hz} \pm 0.26$  and  $0.92 \pm 0.04$  (theta-supplemented 5 ms input). (B) (top) Gain of AD cells tested with both,  $\tau = 5$  ms (dashed line) and theta-supplemented 5 ms (continuous line) inputs ( $n = 10$ ). Boosting theta in the input paradoxically reduces the sensitivity of AD neurons to this frequency band while promoting sensitivity to gamma and ripple frequencies (150-250Hz). (Bottom) The phase of firing rate modulation with respect to the input. No substantial phase-delays are associated with action potential generation, even though the gain magnitude is modulated. (C) Ratios between average gains at gamma and theta (left) and ripple and theta (right) for the individual neurons (diamonds). Both ratios increase when theta power in the input is increased. Gamma/theta ratio for  $\tau = 5$  ms:  $0.56 \pm 0.02$  vs theta-supplemented 5 ms:  $0.74 \pm 0.05$ ,  $n = 10$  (paired sample, two-sided Wilcoxon signed-rank test,  $W = 1$ ,  $p = 0.004$ ). Ripple/theta ratio for  $\tau = 5$  ms:  $0.63 \pm 0.02$  vs theta-supplemented 5 ms:  $0.88 \pm 0.05$ ,  $n = 10$  (two-sided Wilcoxon signed-rank test,  $W = 0$ ,  $p = 0.002$ ). Violin plots show the medians as bars. Numbers are given as mean  $\pm$  SEM

*Theta phase determines gamma sensitivity*

The dynamic gain curves above are based on the timing of all action potentials (APs) fired during a long stimulus period. They represent the average frequency selectivity for a given input statistics and allowed us to detect the boosting for gamma- and ripple frequencies during 30 second long periods of theta-dominated input. During *in vivo* activity, however, short gamma-bursts or ripples occur phase-locked to slower rhythms, consistent with the idea that neurons might be recruited to high-frequency rhythms within a few dozen milliseconds. Specifically, theta-gamma cross-frequency coupling suggests a modulation of gamma sensitivity throughout the phase of the ongoing theta rhythm. To test whether AD neurons indeed display such a



180 modulation, we developed a time-resolved decomposition of the dynamic gain. To this end, we  
 181 reanalyzing the data obtained with the theta-supplemented stimulus (Fig. 3), we determined the  
 182 phase  $\varphi_\theta$  of the stimulus' theta band at each AP time. We sorted the APs into three groups,  
 183 according to  $\varphi_\theta$ . The boundaries between groups,  $\varphi_\theta = -0.017$  and  $\varphi_\theta = 0.476$ , were chosen so  
 184 that each group contained one-third of all APs (Fig. 4A and B, Methods). For each group, the  
 185 average gain across all ten neurons was determined as before (Fig. 4C). As expected for a  
 186 meaningful decomposition, the three gain components combined to replicate the overall  
 187 dynamic gain (Inset in fig. 4C). For each neuron, we calculated three dynamic gain curves, each  
 188 derived from all the APs belonging to one  $\varphi_\theta$  group. The neuron's ability to lock to gamma  
 189 rhythms was quantified as the average gain value in the gamma range (30-150Hz). Across the  
 190 ten neurons, the median value of this gamma sensitivity increased from 27.4 Hz/nA to 37.5  
 191 Hz/nA as  $\varphi_\theta$  goes from the first to the third group, revealing a theta-phase dependent locking of  
 192 APs to gamma inputs (Fig. 4D). The substantially increased gamma sensitivity for APs fired  
 193 later during a theta cycle indicates that AD neurons' frequency tuning changes within a quarter  
 194 of a theta cycle, i.e., within less than 50 ms.

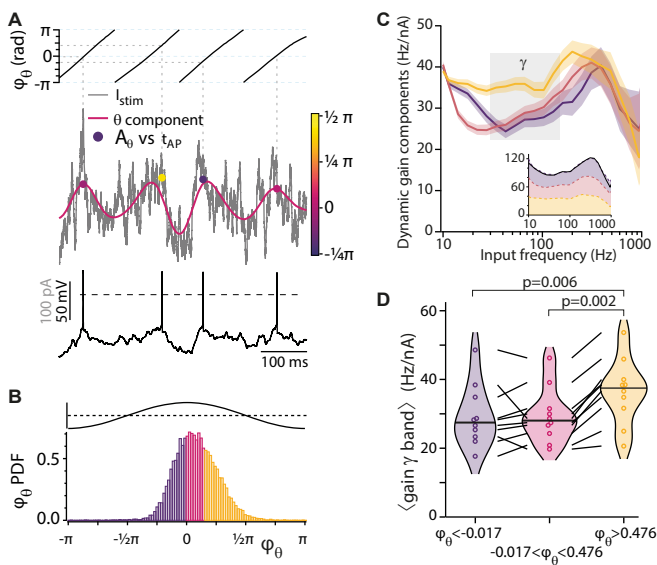

195 **Fig. 4. Sensitivity to gamma frequencies is**  
 196 **modulated during progression through the**  
 197 **theta cycle. (A)** Analysis of theta components  
 198 showing the membrane voltage (bottom, black),  
 199 input current (grey), its theta component  
 200 (magenta, see Methods), and points indicating  
 201 the time of action potentials, plotted against the  
 202 instantaneous theta amplitude  $A_\theta$  obtained by  
 203 Hilbert-Analysis. The color code corresponds to  
 204 the theta phase ( $\varphi_\theta$ , top). (B) A probability  
 205 density plot of  $\varphi_\theta$  with three differently colored  
 206 phase intervals. Each interval contains one-third  
 207 of all APs. The top trace indicates the cosine  
 208 relation between the theta component's phase  
 209 and amplitude. (C) The dynamic gain curves of  
 210 the three components (color code as in B) have

211 distinctive frequency dependencies. Their 95% confidence intervals (shaded) separate in the beta (12 – 30 Hz) and  
 212 gamma frequency bands. In the inset, the three components are stacked. Their sum closely reproduces the overall  
 213 dynamic gain obtained with the theta-supplemented input from fig. 3 B (re-plotted in black in the inset) (D) AD  
 214 neurons' sensitivity to gamma frequencies (Methods) increases during the theta cycle from the lower two  $\varphi_\theta$ -  
 215 intervals:  $29.4 \pm 2.9$  Hz/nA (purple, left) and  $29.4 \pm 2.6$  Hz/nA (magenta, center), to the APs with the highest  $\varphi_\theta$   
 216 values:  $36.5 \pm 3.0$  Hz/nA (orange, right). Gamma sensitivity in the latest interval (orange) is significantly higher  
 217 than in the first (purple,  $W=2$ ,  $p=0.006$ ) and the second (magenta,  $W=0$ ,  $p=0.002$ ), based on paired sample, two-  
 218 sided Wilcoxon signed-rank tests.

## 219 Discussion

221 Our study reveals a novel type of dynamic regulation of AD neuron's response properties.  
 222 When the neurons' input fluctuates rapidly, as during active wakefulness, our data support the  
 223 traditional picture in which AD neurons preferentially encode low-frequency input, and FS  
 224 neurons encode high-frequency (>30 Hz) input. A drastic change in the frequency preference  
 225 of AD neurons occurs, however, when input correlations are slow, as during brain states  
 226 featuring low-frequency dominated local field potentials. Under such conditions, AD neurons  
 227 react preferentially to gamma and ripple frequencies. Our findings thus uncover an  
 228 unanticipated flexibility of interneuron function that allows brain states to tune AD neuron  
 229 population coding and might underlie their reported contribution to gamma oscillations (7, 9).

230 Previously, dynamic gain curves were studied as essentially static properties, determined from  
 231 minute-long stimuli of stationary stochastic properties. Our time-resolved analysis revealed

232 that AD neurons rapidly respond to fluctuations in input statistics, increasing their dynamic  
233 gain in the gamma-band by 50% within a few dozen milliseconds. Our decomposition  
234 approach provides a powerful extension to current population encoding analyses. It allows, for  
235 instance, a quantitative comparison between the encoding capacity of APs within ripples vs  
236 outside ripples, or of AP duplets as compared to isolated APs.

237 Increased encoding of high frequencies (>30 Hz) during particular phases of strong, slow  
238 (theta) components (Figs. 3, 4) closely matches the phenomenon of theta-gamma cross-  
239 frequency coupling (18). In the dynamics of recurrent local circuits, the dynamic gain is a  
240 main component to the feedback gain that determines whether a collective oscillation is  
241 amplified or dies out. In theoretical studies of population oscillations in synchronous (2) or  
242 asynchronous (19) network states, the magnitude and the phase of the dynamic gain are key  
243 determinants of oscillations strength and frequency (20). Therefore, the small phase-delays  
244 associated with AP generation (Figs. 2A, 2C and 3B) and the input-dependent increase in gain  
245 magnitude predict a boost of gamma oscillation amplitude in the presence of theta-frequency  
246 input components and in particular during late theta-phases. The dynamic tuning of spectral  
247 sensitivity in phase with slow input fluctuations is, to our knowledge, the first mechanism  
248 coupling gamma amplitude to theta oscillations that is based on cellular electrophysiological  
249 properties.

250 The wide bandwidth of AD and FS neurons of up to 500 Hz and a maximal sensitivity reached  
251 around 200 Hz is by itself a striking phenomenon. In cortical pyramidal neurons, high  
252 bandwidth dynamic gain is known to mediate the sub-millisecond precision of population  
253 coding for input changes (21), but what function could a narrow preference band at around  
254 200 Hz serve? Retrieval and consolidation of episodic memory require a complex and precise  
255 replay of activity by cell assemblies in the form of high-frequency sharp wave-ripples (150-  
256 250 Hz). Intriguingly, these occur specifically during periods of synchronous network activity,  
257 such as during slow-wave sleep or quiet wakefulness (22), when, as we showed, AD and FS  
258 neurons are most sensitive to high frequencies. Given the input-dependent selectivity switch in  
259 AD neurons, slow oscillations may, in general, boost high-frequency sensitivity of  
260 interneurons and specifically allow AD neurons to tune in to ripple-related inputs and  
261 disinhibit cortical circuits in a precisely timed manner.

## 264 **Materials and Methods**

### 265 ***Animals and slice preparation***

266 All experiments were performed in accordance with institutional and state regulations  
267 (Niedersächsisches Landesamt für Verbraucherschutz und Lebensmittelsicherheit).  
268 Experiments were performed in 3 to 8-week-old mice of either sex from five different mouse  
269 lines. Two lines target mostly AD interneurons: GIN (FVB-Tg(GadGFP)45704Swn, The  
270 Jackson Lab #003718) and SOMCrexAi9 (Ssttm2.1(cre)Zjh/J, The Jackson Lab #013044,  
271 crossbred with B6.Cg-GT(ROSA)26Sor<sup>tm9</sup>(CAG-tdTomato)Hze/J, The Jackson Lab  
272 #007909); and three lines target mostly FS interneurons: PVCre (23), PVCrexAi32 (PVCre  
273 crossbred with B6;129S-Gt(ROSA)26Sortm32(CAG-COP4\*H134R/EYFP)Hze/J, The  
274 Jackson Lab # 012569), and Nkx2.1CreERxAi14 (Nkx2-1tm1.1(cre/ERT2)Zjh/J, The Jackson  
275 Lab # 014552, crossbred with B6;129S6-Gt(ROSA)26Sortm14(CAG-tdTomato)Hze/J, The  
276 Jackson Lab # 007908). Animals were kept in standard 12h light regime with water and food  
277 *ad libidum*. Animals were intraperitoneally-injected with a mixture of ketamine and xylazine  
278 in PBS (respectively 100 and 20 mg/kg of body weight) and decapitated. The brain was  
279 quickly removed and kept in ice-cold, carbogen-saturated cutting solution containing, in mM,  
280 125 NaCl, 2.5 KCl, 26 NaHCO<sub>3</sub>, 1.25 NaH<sub>2</sub>PO<sub>4</sub>, 0.4 Ascorbic Acid, 4 Na-Lactate, 25  
281 Glucose, 1 MgCl<sub>2</sub>, 2 CaCl<sub>2</sub> (~315 mOsm, pH 7.4). 300- $\mu$ m-thick coronal neocortical slices  
282 were made in a VT1200S Vibratome (Leica) and incubated at 35°C in carbogen-saturated

283 recording solution (aCSF, in mM: 125 NaCl, 4 KCl, 26 NaHCO<sub>3</sub>, 10 glucose, 1.3 MgCl<sub>2</sub>, 2  
284 CaCl<sub>2</sub>) until recorded.

### 285 **Patch-clamp recordings**

286 One slice at a time was transferred to a heated recording chamber (PH6 and RC-27L, Warner  
287 Instruments) and mechanically stabilized with a slice hold-down (SHD-27LH/15, Warner  
288 Instruments). Throughout the experiment, the slice was gravitationally perfused with warm  
289 aCSF through an in-line heater (HPT-2, Alasciences) at a 1-2.5 ml/min flow rate. Both the  
290 recording chamber and the in-line heater were controlled by a TC-20 temperature controller  
291 (NPI electronics). Temperature settings were adjusted so that a thermistor measured a target  
292 temperature of  $36 \pm 1^\circ \text{C}$  at the slice position. Slices were visualized in an Axio Examiner.D1  
293 microscope (Zeiss) equipped with a W Plan-Apochromat 40x/1.0 DIC objective. Cells were  
294 visualized with infrared differential interference contrast optics (Zeiss), and fluorescent signal  
295 was imaged with a multi-wavelength LED source (pE-4000, CoolLed) and a CCD camera  
296 (MD061RU-SY, Ximea). 4-6 MOhm pipettes were prepared from borosilicate glass capillaries  
297 (PG10165-4, World Precision Instruments) in a vertical puller (PIP 6, HEKA). Internal  
298 solution contained, in mM, 135 K-Gluconate, 10 KCl, 4 NaCl, 0.1 Na<sub>4</sub>EGTA, 1 Mg-ATP, 0.3  
299 Na-GTP, 10 Hepes, 0.5 Na<sub>2</sub>-Phosphocreatine and 0.2% (w/v) biocytin (285-290 MOsm, pH  
300 adjusted to 7.3). Whole-cell current-clamp recordings were made in an EPC-10 Double  
301 amplifier controlled by Patchmaster (Heka). Fast and slow capacitances and series resistance  
302 were carefully adjusted in voltage-clamp mode before recording; fast capacitances while in  
303 on-cell configuration, slow capacitances after achieving whole-cell configuration. Series  
304 resistance was 90-100% compensated with a feedback time constant of 10  $\mu\text{s}$ . Voltage signals  
305 were low-pass filtered at 8.8 kHz and digitized at 100 kHz. Data analyses were performed in  
306 custom-written Matlab 2014b (Mathworks) and Igor Pro 8 (Wavemetrics) programs. Liquid  
307 junction potential of -14 mV was not corrected. All experiments were performed in the  
308 presence of blockers of GABA receptors (picrotoxin, 30  $\mu\text{M}$ , Sigma) and glutamate receptors  
309 (NBQX, 10  $\mu\text{M}$ , Tocris; and DL-AP5, 30  $\mu\text{M}$ , Sigma).

### 310 **Characterization of action potential firing patterns**

311 Layer 2/3 interneurons were identified via fluorescence imaging. In order to identify their  
312 electrical type, 500-ms-long current steps were applied. Current amplitude was increased in 15  
313 pA steps until at least 1.5 times rheobase, the level at which the characterization of the firing  
314 pattern was made. Only cells exhibiting clear fast-spiking (including stuttering cells) and  
315 adapting electrical types were included in the analysis.

### 316 **Dynamic gain calculation**

317 Population frequency-response characterization was restricted to layer 2/3 prefrontal FS and  
318 AD interneurons and was assessed as previously described (11, 12). This analysis aims to  
319 achieve an *in vivo*-like operating point, mimicking a situation in which a high rate of synaptic  
320 inputs provides a continuously changing net background current, and a neurons' firing is  
321 driven not by the average input but by its transient depolarizing excursions (17). Fluctuating  
322 current inputs were synthesized as Ornstein-Uhlenbeck noises  $x(t)$  with either 5 or 25 ms  
323 correlation time. These values were chosen to approximate the case of uncorrelated inputs  
324 filtered through the synaptic currents' decay time-constants (5 ms) or the case of slow  
325 temporal correlations in the input due to correlated network activity (25 ms). Inputs' standard  
326 deviation was adjusted to obtain similar firing rates (around 4 Hz) and coefficients of variation  
327 of the interspike intervals (around 1) for both correlation times. Neurons were first depolarized  
328 to -60 mV with DC current and different realizations of the fluctuating noise were injected in  
329 30-s-long episodes, separated by 15-s-long resting, for as long as the recording did not display  
330 signs of deterioration, such as baseline drifts or spike overshooting to positive voltages less  
331 than 20 mV. For experiments presented in figure 3, a theta-power enhanced stimulus was  
332 created by adding a 4-12 Hz bandpass filtered white noise to the 5 ms input. The standard  
333 deviation of the bandpass filtered signal was normalized to two times the standard deviation of  
334 the 5 ms signal. APs were detected as 0 mV crossings on the voltage trace and the AP times

335 were annotated. From these, a spike-triggered average input current (STA) was obtained by  
336 summing up 1-s-long stimulus segments centered on the AP times for all cells of a given  
337 condition and dividing by the total number of APs.

338 The complex dynamic gain function  $G(f)$  was calculated as the ratio of the Fourier transform  
339 of the STA,  $F|STA|$ , and the Fourier transform of the autocorrelation of the stimulus,  $F|c_{ss}(\tau)|$   
340 where

$$c_{ss}(\tau) = \langle x(t)x(t + \tau) \rangle,$$

341 and  $\tau$  denotes the time lag. In order to improve signal-to-noise ratio,  $G(f)$  was filtered in the  
342 frequency domain by a Gaussian filter  $w(f')$  centered at frequency  $f'=f$  and a frequency-  
343 dependent window size with standard deviation of  $f/2\pi$ .

$$w(f') = \frac{1}{\sqrt{2\pi} \left(\frac{f}{2\pi}\right)} \exp \left[ \frac{-1}{2} \left( \frac{f' - f}{f/2\pi} \right)^2 \right]$$

344 The filtered dynamic gain function  $G_w(f)$  thus becomes

$$G_w(f) = \frac{\int G(f') \cdot w(f') \cdot df'}{\int w(f') \cdot df'}$$

347 The magnitude and phase of this filtered, complex dynamic gain function are reported in  
348 figures 2 and 3. For the dynamic gains reported in figure 2, the data comprise of: for AD  
349 neurons, 19563 spikes from 12 cells and 20427 spikes from 10 cells (5 ms and 25 ms  
350 respectively), and, for FS neurons, 9792 spikes from 7 cells and 15023 spikes from 9 cells (5  
351 ms and 25 ms, respectively). Five of the 10 AD neurons tested with 5 ms-correlated stimuli  
352 were also tested with the theta-supplemented 5 ms input. In addition to these, another 5 were  
353 used to obtain the gains in figure 3 (14847 spikes, for 5 ms stimulus and 18067 spikes for  
354 theta-supplemented 5 ms stimulus). Confidence intervals were obtained by bootstrap  
355 resampling. 2000 bootstrapped gain curves were calculated from the same number of STAs  
356 obtained by randomly sampling from all STAs used in the population gain calculation. The  
357 confidence intervals are defined as the 2.5<sup>th</sup> and 97.5<sup>th</sup> percentiles at each frequency point in  
358 the 2000 gain curves. The distribution of this bootstrap statistic was not different from normal  
359 (Kolmogorov-Smirnov test). To identify the portions of the gain curves that are significantly  
360 different from zero, we calculated a noise floor. It was calculated by cyclically shifting  
361 original spike times by a random time interval, larger than 5 correlation times, and calculating  
362 2000 “random time-triggered averages”, which were used to calculate “gain curves”. The  
363 noise floor was defined as the 95<sup>th</sup> percentile of these “gain curves”. The gain curves in figures  
364 2 and 3 were displayed either until they were crossed by the noise floor or up to 1000 Hz, if  
365 noise floor crossing happened at a frequency  $> 1000$  Hz.

### 367 **Hilbert Analysis**

368 The stimulus' theta phase component was extracted by filtering with an infinite impulse  
369 response bandpass filter with 6 pole Butterworth characteristics. The filter was designed in  
370 Igor Pro 8 with pass-band limits of 3.5 and 10.5 Hz for the sample time of 100kHz. Used  
371 twice, once in forward time, once in reversed time, the filter results in zero-delay filtering of  
372 the input. Fourier analysis of the input and output shows effective isolation of the 4 to 12 Hz  
373 component. The phase and amplitude of this component were obtained by conventional  
374 Hilbert analysis. APs were stratified according to the phase of the theta component at the AP  
375 time to perform the analysis in figure 4.

### 376 **Statistics**

377 Paired samples, two-sided Wilcoxon rank tests were performed to test the single neuron data  
378 in figures 3 and 4. W-statistics and p values are given in figures and legends. The p-values in  
379 figure 4 are not corrected for the dual comparison.



## Acknowledgments

### Funding:

Bundesministerium für Bildung und Forschung (BMBF, Federal Ministry of Education and Research) grant 01GQ1005B (FW, AN)

Bundesministerium für Bildung und Forschung (BMBF, Federal Ministry of Education and Research) grant 01GQ1005E (FW)

Deutsche Forschungsgemeinschaft (DFG, German Research Foundation) – 436260547, in relation to NeuroNex (NSF 2015276)

VW Foundation grant ZN2632 (FW)

GGNB Excellence Stipend of the University of Göttingen (RMM)

Max Planck Society

### Author contributions:

R.M.M., C.L.P., F.W., and A.N. conceived the study. R.M.M. performed the experiments with contributions from M.M. R.M.M., C.L.P., F.W., and A.N. analyzed and interpreted the data. F.W., A.N., W.S., and J.F.S. provided resources. All authors discussed and interpreted the data. R.M.M., F.W., and A.N. wrote the paper with inputs from all other authors.

**Competing interests:** Authors declare no competing interest.

**Data and materials availability:** All data are available from the corresponding author upon reasonable request. Raw data underlying the dynamic gain curves can be downloaded from this permanent repository at the Max Planck Digital Library:

<https://edmond.mpdl.mpg.de/imeji/collection/pdxNFpqJurbDDeop>.

*This permalink is for review purposes. It will be replaced with a DOI.*

The code, written in IgorPro 8.0 and 9.0, used to analyze raw data and generate the dynamic gain curves, is included in the data repository. The code is continuously maintained. The latest version is available at <https://github.com/Anneef/AnTools>.

## References

1. G. Buzsáki, A. Draguhn, Neuronal oscillations in cortical networks. *Science* **304**, 1926-1929 (2004); published online EpubJun 25 (10.1126/science.1099745).
2. J. Cannon, M. M. McCarthy, S. Lee, J. Lee, C. Borgers, M. A. Whittington, N. Kopell, Neurosystems: brain rhythms and cognitive processing. *Eur J Neurosci* **39**, 705-719 (2014); published online EpubMar (10.1111/ejn.12453).
3. J. E. Lisman, O. Jensen, The theta-gamma neural code. *Neuron* **77**, 1002-1016 (2013); published online EpubMar 20 (10.1016/j.neuron.2013.03.007).
4. J. A. Cardin, M. Carlen, K. Meletis, U. Knoblich, F. Zhang, K. Deisseroth, L. H. Tsai, C. I. Moore, Driving fast-spiking cells induces gamma rhythm and controls sensory responses. *Nature* **459**, 663-667 (2009); published online EpubJun 4 (10.1038/nature08002).
5. M. A. Whittington, R. D. Traub, J. G. Jefferys, Synchronized oscillations in interneuron networks driven by metabotropic glutamate receptor activation. *Nature* **373**, 612-615 (1995); published online EpubFeb 16 (10.1038/373612a0).
6. F. G. Pike, R. S. Goddard, J. M. Suckling, P. Ganter, N. Kasthuri, O. Paulsen, Distinct frequency preferences of different types of rat hippocampal neurones in response to oscillatory input currents. *J Physiol* **529 Pt 1**, 205-213 (2000); published online EpubNov 15 (
7. J. Veit, R. Hakim, M. P. Jadi, T. J. Sejnowski, H. Adesnik, Cortical gamma band synchronization through somatostatin interneurons. *Nat Neurosci* **20**, 951-959 (2017); published online EpubJul (10.1038/nn.4562).

- 435 8. R. Hakim, K. Shamardani, H. Adesnik, A neural circuit for gamma-band coherence  
436 across the retinotopic map in mouse visual cortex. *Elife* **7**, (2018); published online  
437 EpubFeb 26 (10.7554/eLife.28569).
- 438 9. G. Chen, Y. Zhang, X. Li, X. Zhao, Q. Ye, Y. Lin, H. W. Tao, M. J. Rasch, X. Zhang,  
439 Distinct Inhibitory Circuits Orchestrate Cortical beta and gamma Band Oscillations.  
440 *Neuron* **96**, 1403-1418 e1406 (2017); published online EpubDec 20  
441 (10.1016/j.neuron.2017.11.033).
- 442 10. H. Kondgen, C. Geisler, S. Fusi, X. J. Wang, H. R. Luscher, M. Giugliano, The  
443 dynamical response properties of neocortical neurons to temporally modulated noisy  
444 inputs in vitro. *Cereb Cortex* **18**, 2086-2097 (2008); published online EpubSep  
445 (10.1093/cercor/bhm235).
- 446 11. E. Lazarov, M. Dannemeyer, B. Feulner, J. Enderlein, M. J. Gutnick, F. Wolf, A. Neef,  
447 An axon initial segment is required for temporal precision in action potential encoding  
448 by neuronal populations. *Science advances* **4**, eaau8621 (2018); published online  
449 EpubNov (10.1126/sciadv.aau8621).
- 450 12. M. H. Higgs, W. J. Spain, Conditional bursting enhances resonant firing in neocortical  
451 layer 2-3 pyramidal neurons. *J Neurosci* **29**, 1285-1299 (2009); published online  
452 EpubFeb 4 (10.1523/JNEUROSCI.3728-08.2009).
- 453 13. N. Brunel, F. S. Chance, N. Fourcaud, L. F. Abbott, Effects of synaptic noise and  
454 filtering on the frequency response of spiking neurons. *Phys Rev Lett* **86**, 2186-2189  
455 (2001); published online EpubMar 5 (
- 456 14. B. Naundorf, F. Wolf, M. Volgushev, Unique features of action potential initiation in  
457 cortical neurons. *Nature* **440**, 1060-1063 (2006); published online EpubApr 20  
458 (10.1038/nature04610).
- 459 15. J. F. A. Poulet, S. Crochet, The Cortical States of Wakefulness. *Frontiers in systems*  
460 *neuroscience* **12**, 64 (2018)10.3389/fnsys.2018.00064).
- 461 16. D. Feldmeyer, G. Qi, V. Emmenegger, J. F. Staiger, Inhibitory interneurons and their  
462 circuit motifs in the many layers of the barrel cortex. *Neuroscience* **368**, 132-151  
463 (2018); published online EpubJan 1 (10.1016/j.neuroscience.2017.05.027).
- 464 17. A. Destexhe, M. Rudolph, D. Pare, The high-conductance state of neocortical neurons  
465 in vivo. *Nat Rev Neurosci* **4**, 739-751 (2003); published online EpubSep  
466 (10.1038/nrn1198).
- 467 18. R. T. Canolty, R. T. Knight, The functional role of cross-frequency coupling. *Trends*  
468 *Cogn Sci* **14**, 506-515 (2010); published online EpubNov (10.1016/j.tics.2010.09.001).
- 469 19. N. Brunel, V. Hakim, Fast global oscillations in networks of integrate-and-fire neurons  
470 with low firing rates. *Neural Comput* **11**, 1621-1671 (1999); published online EpubOct  
471 1 (10.1162/089976699300016179).
- 472 20. C. Geisler, N. Brunel, X. J. Wang, Contributions of intrinsic membrane dynamics to  
473 fast network oscillations with irregular neuronal discharges. *J Neurophysiol* **94**, 4344-  
474 4361 (2005); published online EpubDec (10.1152/jn.00510.2004).
- 475 21. T. Tchumatchenko, A. Malyshev, F. Wolf, M. Volgushev, Ultrafast population  
476 encoding by cortical neurons. *J Neurosci* **31**, 12171-12179 (2011); published online  
477 EpubAug 24 (10.1523/JNEUROSCI.2182-11.2011).
- 478 22. H. R. Joo, L. M. Frank, The hippocampal sharp wave-ripple in memory retrieval for  
479 immediate use and consolidation. *Nat Rev Neurosci* **19**, 744-757 (2018); published  
480 online EpubDec (10.1038/s41583-018-0077-1).
- 481 23. A. H. Meyer, I. Katona, M. Blatow, A. Rozov, H. Monyer, In vivo labeling of  
482 parvalbumin-positive interneurons and analysis of electrical coupling in identified  
483 neurons. *J Neurosci* **22**, 7055-7064 (2002); published online EpubAug 15 (20026742).
- 484
